# Supplementary material for: An Enteroendocrine Cell – Enteric Glia Connection Revealed by 3D Electron Microscopy
Source: PubMed Central journal article supplement (PMC3935946; doi:10.1371/journal.pone.0089881), 2014-02-26
Supplement: pone.0089881.s006.pdf [file pone.0089881.s006.pdf]

**Table S1. Taqman probes used in quantitative RT-PCR.**

| Gene Name                                               | Common function    | Symbol | Cat. No.      |
|---------------------------------------------------------|--------------------|--------|---------------|
| Glyceraldehyde 3-phosphate dehydrogenase                | House keeping gene | Gapdh  | Mm99999915_g1 |
| Peptide YY                                              | Neuropeptide       | Pyy    | Mm00520716_g1 |
| Colecystokinin                                          | Neuropeptide       | Cck    | Mm00446170_m1 |
| Neurofilament heavy                                     | Axonal proteins    | Nefh   | Mm01191456_m1 |
| Neurofilament medium                                    | Axonal proteins    | Nefm   | Mm00456201_m1 |
| Neurofilament light                                     | Axonal proteins    | Nefl   | Mm01315666_m1 |
| Glial cell derived neurotrophic factor receptor alpha 1 | Axonal growth      | Gfra1  | Mm00833897_m1 |
| Glial cell derived neurotrophic factor receptor alpha 3 | Axonal growth      | Gfra3  | Mm00494589_m1 |
| Neurotrophic tyrosine kinase, receptor, type 1          | Axonal growth      | TrkA   | Mm01219406_m1 |
| Neurotrophic tyrosine kinase, receptor, type 2          | Axonal growth      | TrkB   | Mm00435422_m1 |
| Neurotrophic tyrosine kinase, receptor, type 3          | Axonal growth      | TrkC   | Mm00456222_m1 |
| Nerve growth factor receptor                            | Axonal growth      | Ngfr   | Mm01309635_m1 |
