# Supplementary material for: An Enteroendocrine Cell – Enteric Glia Connection Revealed by 3D Electron Microscopy
Source: PubMed Central journal article supplement (PMC3935946; doi:10.1371/journal.pone.0089881), 2014-02-26
Supplement: pone.0089881.s007.pdf [file pone.0089881.s007.pdf]

**Table S2. Primary antibodies used for immunofluorescence.**

| Target                            | Symbol          | Species | Dilution <sup>†</sup> | Source    | Cat. #.     |
|-----------------------------------|-----------------|---------|-----------------------|-----------|-------------|
| Green fluorescent protein         | GFP             | Chicken | 1:1000                | Abcam     | ab13970     |
| Green fluorescent protein         | GFP             | Goat    | 1:1000                | Abcam     | ab6673      |
| Peptide YY (aa 4-21) <sup>1</sup> | PYY             | Rabbit  | 1:2000                | Biosource | Custom made |
| Cholecystokinin                   | CCK             | Rabbit  | 1:2000                | Biosource | Custom made |
| Glial fibrillary acidic protein   | GFAP            | Rabbit  | 1:2000                | Dako      | Z0334       |
| S100- $\beta$                     | S100- $\beta$   | Rabbit  | 1:500                 | Abcam     | ab41548     |
| $\alpha$ -smooth muscle actin     | $\alpha$ -SMA   | Rabbit  | 1:500                 | Abcam     | ab5694      |
| Neurofilament light               | NF <sub>L</sub> | Rabbit  | 1:1000                | Abcam     | ab9035      |
| Neurofilament medium              | NF <sub>M</sub> | Rabbit  | 1:2000                | Abcam     | ab9034      |
| Neurofilament medium              | NF <sub>M</sub> | Mouse   | 1:500                 | Abcam     | ab7794      |
| Neurofilament heavy               | NF <sub>H</sub> | Rabbit  | 1:2000                | Abcam     | ab8135      |
| Neurofilament heavy               | NF <sub>H</sub> | Chicken | 1:500                 | Abcam     | ab72996     |

<sup>†</sup>All antibodies were diluted in 50mM TRIS-buffered saline containing 0.05% Tween-20 and 0.1% bovine serum albumen.
